# Supplementary material for: Measuring strain during a cylindrical grinding process using embedded sensors in a workpiece
Source: Copernicus journal article supplement (doi:10.5194/jsss-6-331-2017), 2017-09-15
Supplement: Supplementary file 1 [file jsss-6-331-2017-supplement.zip]

Archive with 3 entries (3 files):
- jsss-6-331-2017-supplement-title-page.pdf
- Experiment 2.xlsx
- Experiment 1.xlsx
