# Supplementary material for: Measuring strain during a cylindrical grinding process using embedded sensors in a workpiece
Source: Copernicus journal article supplement (doi:10.5194/jsss-6-331-2017), 2017-09-15
Supplement: Supplementary file 1 [file jsss-6-331-2017-supplement.zip › Experiment 1.xlsx]

## Sheet: Sheet1
Grinding number	Max.Bridge voltage Sensor 1 (mV)				Converted Strain (µm/m)		Max.Bridge voltage Sensor 2 (mV)				Converted Strain (µm/m)		External Forces Normal (N)Fn	External Forces Tangential (N)Ft	Resultant Forces Fr	Depth of cut ae
1	0.056528	5.6528e-05	1.13056e-05	1.71293e-05	17.1293		0.066931	6.6931e-05	1.33862e-05	2.02816e-05	20.2816		23.72	15.9	28.5561	1
2	0.060346	6.0346e-05	1.20692e-05	1.82862e-05	18.2862		0.061841	6.1841e-05	1.23682e-05	1.87392e-05	18.7392		25.16	17.01	30.3705	1.1
3	0.062892	6.2892e-05	1.25784e-05	1.90577e-05	19.0577		0.063114	6.3114e-05	1.26228e-05	1.9125e-05	19.125		27	17.8	32.3394	1.2
4	0.062892	6.2892e-05	1.25784e-05	1.90577e-05	19.0577		0.061841	6.1841e-05	1.23682e-05	1.87392e-05	18.7392		27.21	17.9	32.5698	1.3
5	0.064165	6.4165e-05	1.2833e-05	1.94434e-05	19.4434		0.068204	6.8204e-05	1.36408e-05	2.06673e-05	20.6673		27.4	18.25	32.9215	1.4
6	0.066711	6.6711e-05	1.33422e-05	2.02149e-05	20.2149		0.069476	6.9476e-05	1.38952e-05	2.10527e-05	21.0527		27.15	18.25	32.7137	1.5
7	0.03489	3.489e-05	6.978e-06	1.05726e-05	10.5726		0.033847	3.3847e-05	6.7694e-06	1.02565e-05	10.2565		26.44	18.35	32.1838	1.6
8	0.066711	6.6711e-05	1.33422e-05	2.02149e-05	20.2149		0.069476	6.9476e-05	1.38952e-05	2.10527e-05	21.0527		27.02	17.94	32.4334	1.7
9	0.065438	6.5438e-05	1.30876e-05	1.98292e-05	19.8292		0.064386	6.4386e-05	1.28772e-05	1.95104e-05	19.5104		27.1	17.84	32.445	1.8
10	0.069256	6.9256e-05	1.38512e-05	2.09861e-05	20.9861		0.070749	7.0749e-05	1.41498e-05	2.14385e-05	21.4385		25.91	16.72	30.8364	1.9
11	0.067983	6.7983e-05	1.35966e-05	2.06003e-05	20.6003		0.072021	7.2021e-05	1.44042e-05	2.18239e-05	21.8239		25.76	16.62	30.6562	2
