# Supplementary material for: Measuring strain during a cylindrical grinding process using embedded sensors in a workpiece
Source: Copernicus journal article supplement (doi:10.5194/jsss-6-331-2017), 2017-09-15
Supplement: Supplementary file 1 [file jsss-6-331-2017-supplement.zip › Experiment 2.xlsx]

## Sheet: Sheet1
	Sensor 1							Sensor 2
	Grinding number	Max. Bridge Voltage (mV)				Converted Strain (µm/m)		Max. Bridge Voltage (mV)				Converted Strain (µm/m)	Grinding number		Max. External forces Normal (N) Fn	Max. External forces Tangential (N) Ft	Resultant Forces (N) Fr
	1	0.072712	7.2712e-05	0.0145424	0.0214112	21.4112		0.071474	7.1474e-05	1.42948e-05	2.16582e-05	21.6582	1		24.29	17.45	29.9083
	2	0.071439	7.1439e-05	0.0142878	0.0210468	21.0468		0.066384	6.6384e-05	1.32768e-05	2.01158e-05	20.1158	2		24.34	17.71	30.1012
	3	0.071439	7.1439e-05	0.0142878	0.0210468	21.0468		0.072746	7.2746e-05	1.45492e-05	2.20436e-05	22.0436	3		25.13	17.35	30.5375
	4	0.071439	7.1439e-05	0.0142878	0.0210468	21.0468		0.075291	7.5291e-05	1.50582e-05	2.28148e-05	22.8148	4		26.13	18.18	31.8322
	5	0.080349	8.0349e-05	0.0160698	0.02359	23.59		0.075291	7.5291e-05	1.50582e-05	2.28148e-05	22.8148	5		25.97	18.21	31.7182
	6	0.077803	7.7803e-05	0.0155606	0.0228651	22.8651		0.075291	7.5291e-05	1.50582e-05	2.28148e-05	22.8148	6		25.76	18.14	31.5061
	7	0.072712	7.2712e-05	0.0145424	0.0214112	21.4112		0.074019	7.4019e-05	1.48038e-05	2.24293e-05	22.4293	7		24.85	17.95	30.6549
	8	0.066348	6.6348e-05	0.0132696	0.0195857	19.5857		0.060021	6.0021e-05	1.20042e-05	1.81877e-05	18.1877	8		24.87	17.66	30.5023
	9	0.089288	8.9288e-05	0.0178576	0.0261239	26.1239		0.086713	8.6713e-05	1.73426e-05	2.62758e-05	26.2758	9		25.34	17.87	31.0073
	10	0.086713	8.6713e-05	0.0173426	0.0253958	25.3958		0.084198	8.4198e-05	1.68396e-05	2.55137e-05	25.5137	10		25	18.14	30.8879
	11	0.09435	9.435e-05	0.01887	0.0275511	27.5511		0.090561	9.0561e-05	1.81122e-05	2.74417e-05	27.4417	11		25.91	17.06	31.0221
