# Supplementary material for: Measuring strain during a cylindrical grinding process using embedded sensors in a workpiece
Source: Copernicus journal article supplement (doi:10.5194/jsss-6-331-2017), 2017-09-15
Supplement: Supplementary file 1 [file jsss-6-331-2017-supplement.zip › jsss-6-331-2017-supplement-title-page.pdf]

Supplement of J. Sens. Sens. Syst., 6, 331–340, 2017  
<https://doi.org/10.5194/jsss-6-331-2017-supplement>  
© Author(s) 2017. This work is distributed under  
the Creative Commons Attribution 3.0 License.

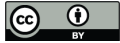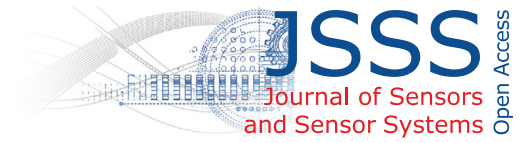

*Supplement of*

## **Measuring strain during a cylindrical grinding process using embedded sensors in a workpiece**

**Mridusmita Sarma et al.**

*Correspondence to:* Mridusmita Sarma ([msarma@imsas.uni-bremen.de](mailto:msarma@imsas.uni-bremen.de))

- [jsss-6-331-2017-supplement-title-page.pdf](#)
- [Experiment 1.xlsx](#)
- [Experiment 2.xlsx](#)

The copyright of individual parts of the supplement might differ from the CC BY 3.0 License.
